# Supplementary material
Source: publisher figshare collection journal article supplement (https://tandf.figshare.com/ndownloader/files/21553974)
Supplement: Supplementary file 1 [file 21553974]

## Supplementary material

### New Phenolic Acids from *Elephantopus scaber* Linn. and their Anti- inflammatory Activity

Lu Fu, Di Pei, Meng Yu, Hai Shang, Jin-Guang Si, Hong-Wu Zhang, Tao Zhang<sup>\*</sup> and Zhong-Mei Zou<sup>\*</sup>

*Institute of Medicinal Plant Development, Chinese Academy of Medical Sciences and Peking Union Medical College, Beijing 100193, P. R. China.*

#### CONTACT:

Corresponding Author: zmzou@implad.ac.cn (Z.-M. Zou) and zt830423@163.com (T. Zhang)

#### ABSTRACT

Two new phenolic acids, ethyl 3,3',4,4'-tetrahydroxy- $\delta$ -truxinate (**1**), 3-*O*-*p*-coumaroyl-4-*O*-caffeoyl quinic acid methyl ester (**2**), together with three known compounds (**3–5**) were isolated from the whole plant of *Elephantopus scaber* Linn.. The structures of the new compounds were elucidated using detailed spectroscopic analysis. Compound **3** was obtained and given its NMR data for the first time. All isolates were evaluated for their anti-inflammatory activity *via* inhibiting the production of nitric oxide (NO) in lipopolysaccharide (LPS)-stimulated murine macrophage RAW 264.7 cells, and **1**, **4** and **5** showed a moderate inhibition with IC<sub>50</sub> values ranging from 11.85 to 20.62  $\mu$ M.

## Contents of Supplementary Information

|             | contents                                                                                                                                                                                                           |
|-------------|--------------------------------------------------------------------------------------------------------------------------------------------------------------------------------------------------------------------|
| Figure S1.  | Key $^1\text{H}$ - $^1\text{H}$ COSY and HMBC correlations of compounds <b>1</b> and <b>2</b>                                                                                                                      |
| Figure S2.  | $^1\text{H}$ NMR spectrum (600 MHz) of ethyl 3,3',4,4'-tetrahydroxy- $\delta$ -truxinate ( <b>1</b> ) in $\text{CD}_3\text{OD}$                                                                                    |
| Figure S3.  | $^{13}\text{C}$ NMR spectrum (150 MHz) of ethyl 3,3',4,4'-tetrahydroxy- $\delta$ -truxinate ( <b>1</b> ) in $\text{CD}_3\text{OD}$                                                                                 |
| Figure S4.  | $^1\text{H}$ - $^1\text{H}$ COSY spectrum (600 MHz) of ethyl 3,3',4,4'-tetrahydroxy- $\delta$ -truxinate ( <b>1</b> ) in $\text{CD}_3\text{OD}$                                                                    |
| Figure S5.  | HSQC spectrum (600 MHz) of ethyl 3,3',4,4'-tetrahydroxy- $\delta$ -truxinate ( <b>1</b> ) in $\text{CD}_3\text{OD}$                                                                                                |
| Figure S6.  | HMBC spectrum (600 MHz) of ethyl 3,3',4,4'-tetrahydroxy- $\delta$ -truxinate ( <b>1</b> ) in $\text{CD}_3\text{OD}$                                                                                                |
| Figure S7.  | ROESY spectrum (600 MHz) of ethyl 3,3',4,4'-tetrahydroxy- $\delta$ -truxinate ( <b>1</b> ) in $\text{CD}_3\text{OD}$                                                                                               |
| Figure S8.  | UV spectrum of ethyl 3,3',4,4'-tetrahydroxy- $\delta$ -truxinate ( <b>1</b> )                                                                                                                                      |
| Figure S9.  | IR spectrum of ethyl 3,3',4,4'-tetrahydroxy- $\delta$ -truxinate ( <b>1</b> )                                                                                                                                      |
| Figure S10. | HRESIMS spectrum of ethyl 3,3',4,4'-tetrahydroxy- $\delta$ -truxinate ( <b>1</b> )                                                                                                                                 |
| Figure S11. | $^1\text{H}$ NMR spectrum (500 MHz) of ethyl 3,3',4,4'-tetrahydroxy- $\delta$ -truxinate ( <b>1</b> ) in $\text{CD}_3\text{COCD}_3$                                                                                |
| Figure S12. | $^1\text{H}$ NMR spectrum (600 MHz) of 3- <i>O</i> - <i>p</i> -coumaroyl-4- <i>O</i> -caffeoyl quinic acid methyl ester ( <b>2</b> ) in $\text{CD}_3\text{OD}$                                                     |
| Figure S13. | $^{13}\text{C}$ NMR spectrum (150 MHz) of 3- <i>O</i> - <i>p</i> -coumaroyl-4- <i>O</i> -caffeoyl quinic acid methyl ester ( <b>2</b> ) in $\text{CD}_3\text{OD}$                                                  |
| Figure S14. | $^1\text{H}$ - $^1\text{H}$ COSY spectrum (600 MHz) of 3- <i>O</i> - <i>p</i> -coumaroyl-4- <i>O</i> -caffeoyl quinic acid methyl ester ( <b>2</b> ) in $\text{CD}_3\text{OD}$                                     |
| Figure S15. | HSQC spectrum (600 MHz) of 3- <i>O</i> - <i>p</i> -coumaroyl-4- <i>O</i> -caffeoyl quinic acid methyl ester ( <b>2</b> ) in $\text{CD}_3\text{OD}$                                                                 |
| Figure S16. | HMBC spectrum (600 MHz) of 3- <i>O</i> - <i>p</i> -coumaroyl-4- <i>O</i> -caffeoyl quinic acid methyl ester ( <b>2</b> ) in $\text{CD}_3\text{OD}$                                                                 |
| Figure S17. | ROESY spectrum (600 MHz) of 3- <i>O</i> - <i>p</i> -coumaroyl-4- <i>O</i> -caffeoyl quinic acid methyl ester ( <b>2</b> ) in $\text{CD}_3\text{OD}$                                                                |
| Figure S18. | UV spectrum of 3- <i>O</i> - <i>p</i> -coumaroyl-4- <i>O</i> -caffeoyl quinic acid methyl ester ( <b>2</b> )                                                                                                       |
| Figure S19. | IR spectrum of 3- <i>O</i> - <i>p</i> -coumaroyl-4- <i>O</i> -caffeoyl quinic acid methyl ester ( <b>2</b> )                                                                                                       |
| Figure S20. | HRESIMS spectrum of 3- <i>O</i> - <i>p</i> -coumaroyl-4- <i>O</i> -caffeoyl quinic acid methyl ester ( <b>2</b> )                                                                                                  |
| Figure S21. | $^1\text{H}$ NMR spectrum (600 MHz) of 3- <i>O</i> -caffeoyl-4- <i>O</i> - <i>p</i> -coumaroyl quinic acid methyl ester ( <b>3</b> ) in $\text{CD}_3\text{OD}$                                                     |
| Figure S22. | $^{13}\text{C}$ NMR spectrum (150 MHz) of 3- <i>O</i> -caffeoyl-4- <i>O</i> - <i>p</i> -coumaroyl quinic acid methyl ester ( <b>3</b> ) in $\text{CD}_3\text{OD}$                                                  |
| Figure S23. | $^1\text{H}$ - $^1\text{H}$ COSY spectrum (600 MHz) of 3- <i>O</i> -caffeoyl-4- <i>O</i> - <i>p</i> -coumaroyl quinic acid methyl ester ( <b>3</b> ) in $\text{CD}_3\text{OD}$                                     |
| Figure S24. | HSQC spectrum (600 MHz) of 3- <i>O</i> -caffeoyl-4- <i>O</i> - <i>p</i> -coumaroyl quinic acid methyl ester ( <b>3</b> ) in $\text{CD}_3\text{OD}$                                                                 |
| Figure S25. | HMBC spectrum (600 MHz) of 3- <i>O</i> -caffeoyl-4- <i>O</i> - <i>p</i> -coumaroyl quinic acid methyl ester ( <b>3</b> ) in $\text{CD}_3\text{OD}$                                                                 |
| Figure S26. | ROESY spectrum (600 MHz) of 3- <i>O</i> -caffeoyl-4- <i>O</i> - <i>p</i> -coumaroyl quinic acid methyl ester ( <b>3</b> ) in $\text{CD}_3\text{OD}$                                                                |
| Figure S27. | UV spectrum of 3- <i>O</i> -caffeoyl-4- <i>O</i> - <i>p</i> -coumaroyl quinic acid methyl ester ( <b>3</b> )                                                                                                       |
| Figure S28. | IR spectrum of 3- <i>O</i> -caffeoyl-4- <i>O</i> - <i>p</i> -coumaroyl quinic acid methyl ester ( <b>3</b> )                                                                                                       |
| Figure S29. | HRESIMS spectrum of 3- <i>O</i> -caffeoyl-4- <i>O</i> - <i>p</i> -coumaroyl quinic acid methyl ester ( <b>3</b> )                                                                                                  |
| Table S1.   | $^1\text{H}$ (600 MHz) and $^{13}\text{C}$ NMR (150 MHz) data of compounds <b>1</b> , <b>2</b> and <b>3</b> in $\text{CD}_3\text{OD}$                                                                              |
| Table S2.   | $^1\text{H}$ (500 MHz) data of compound <b>1</b> in $\text{CD}_3\text{COCD}_3$ ,<br>and $^1\text{H}$ (600 MHz) and $^{13}\text{C}$ NMR (150 MHz) data of compounds <b>4</b> and <b>5</b> in $\text{CD}_3\text{OD}$ |
| Table S3.   | Inhibition of compounds <b>1–5</b> on the NO production in LPS-activated RAW264.7 cells.                                                                                                                           |
| Table S4.   | Effects of compounds <b>1–5</b> (100 $\mu\text{M}$ ) on RAW264.7 cells viability.                                                                                                                                  |

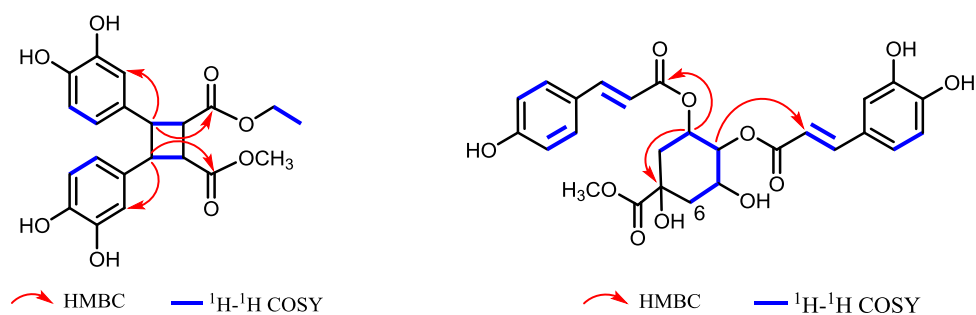

Figure S1. Key  $^1\text{H}$ - $^1\text{H}$  COSY and HMBC correlations of compounds **1** and **2**.

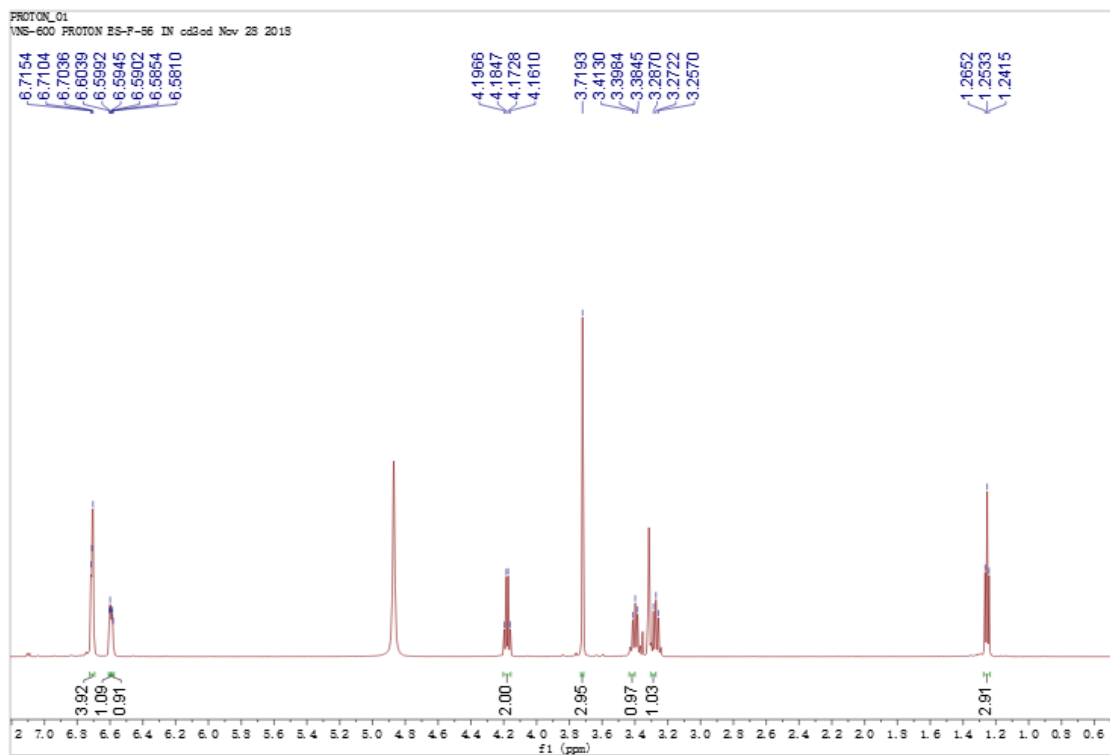

Figure S2.  $^1\text{H}$  NMR spectrum (600 MHz) of ethyl 3,3',4,4'-tetrahydroxy- $\delta$ -truxinate (**1**) in  $\text{CD}_3\text{OD}$ .

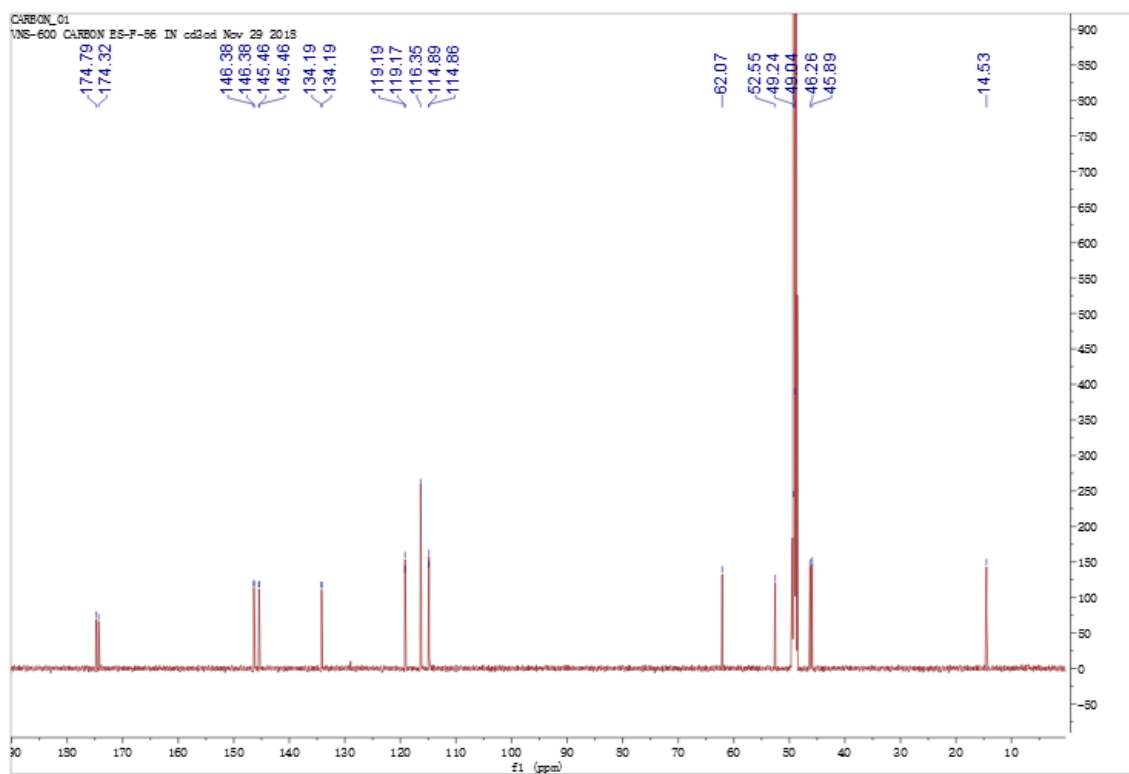

Figure S3.  $^{13}\text{C}$  NMR spectrum (150 MHz) of ethyl 3,3',4,4'-tetrahydroxy- $\delta$ -truxinate (**1**) in  $\text{CD}_3\text{OD}$ .

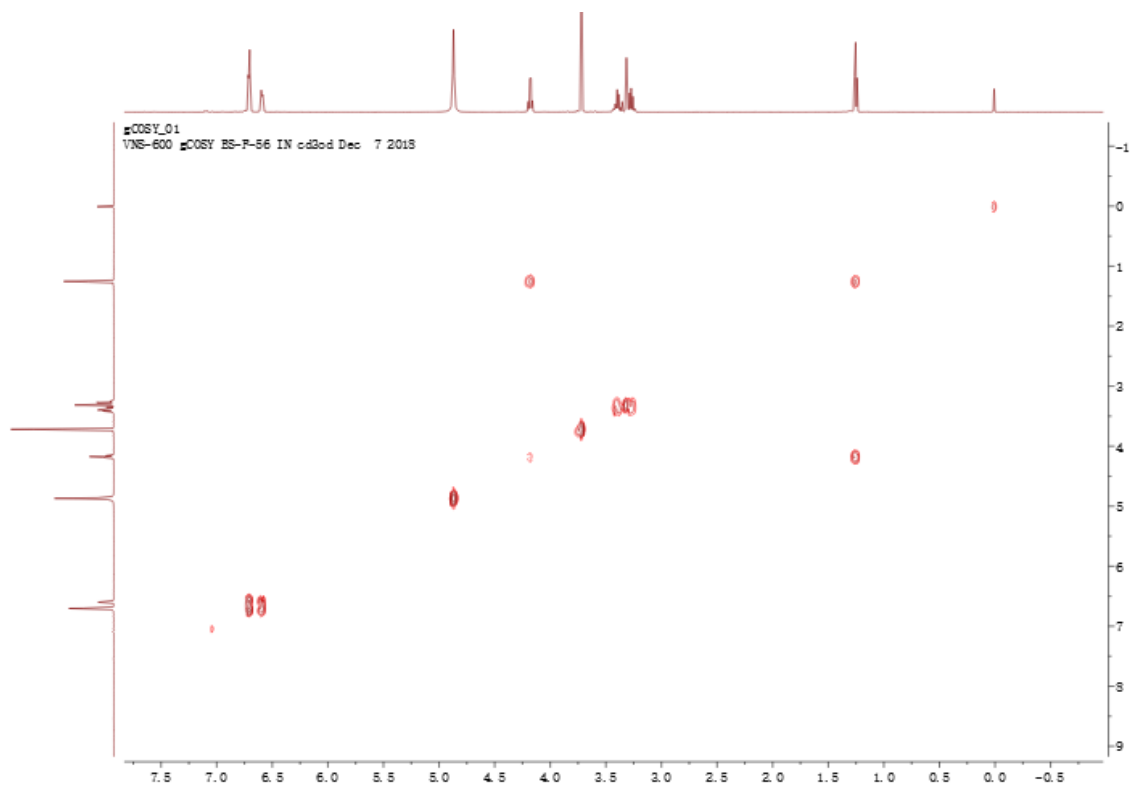

Figure S4.  $^1\text{H}$ - $^1\text{H}$  COSY spectrum (600 MHz) of ethyl 3,3',4,4'-tetrahydroxy- $\delta$ -truxinate (**1**) in  $\text{CD}_3\text{OD}$ .

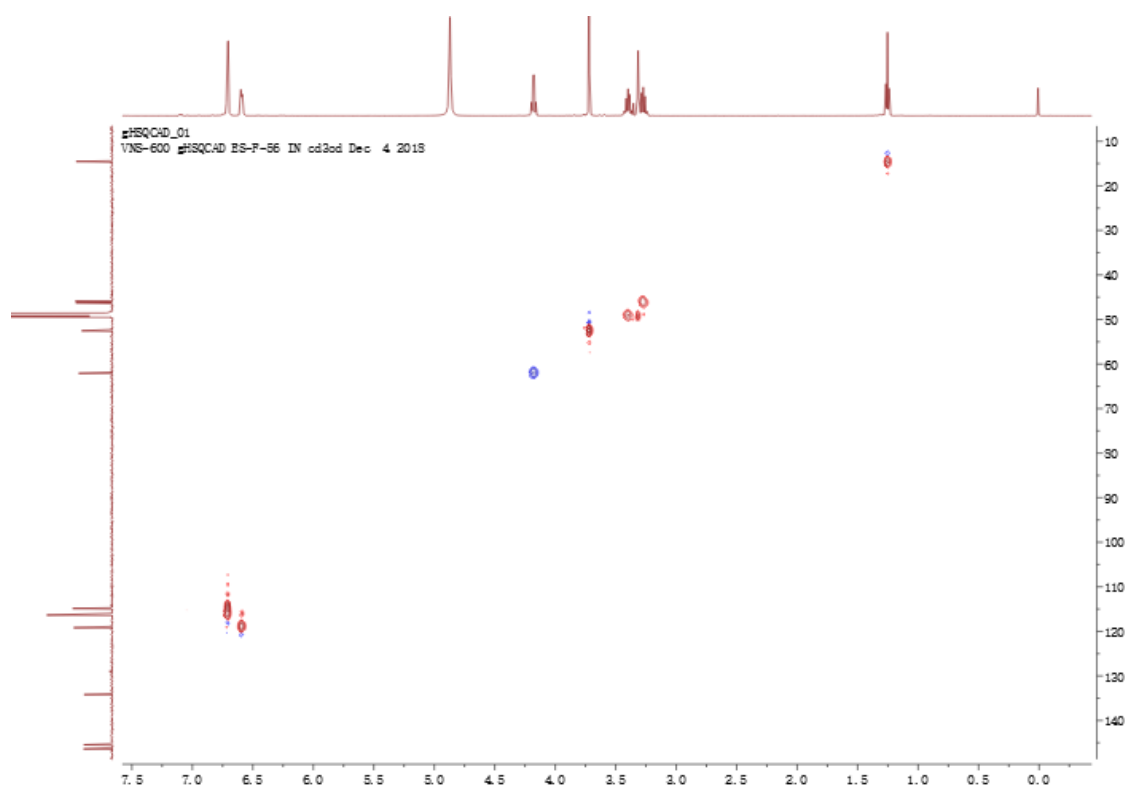

Figure S5. HSQC spectrum (600 MHz) of ethyl 3,3',4,4'-tetrahydroxy- $\delta$ -truxinate (**1**) in CD<sub>3</sub>OD.

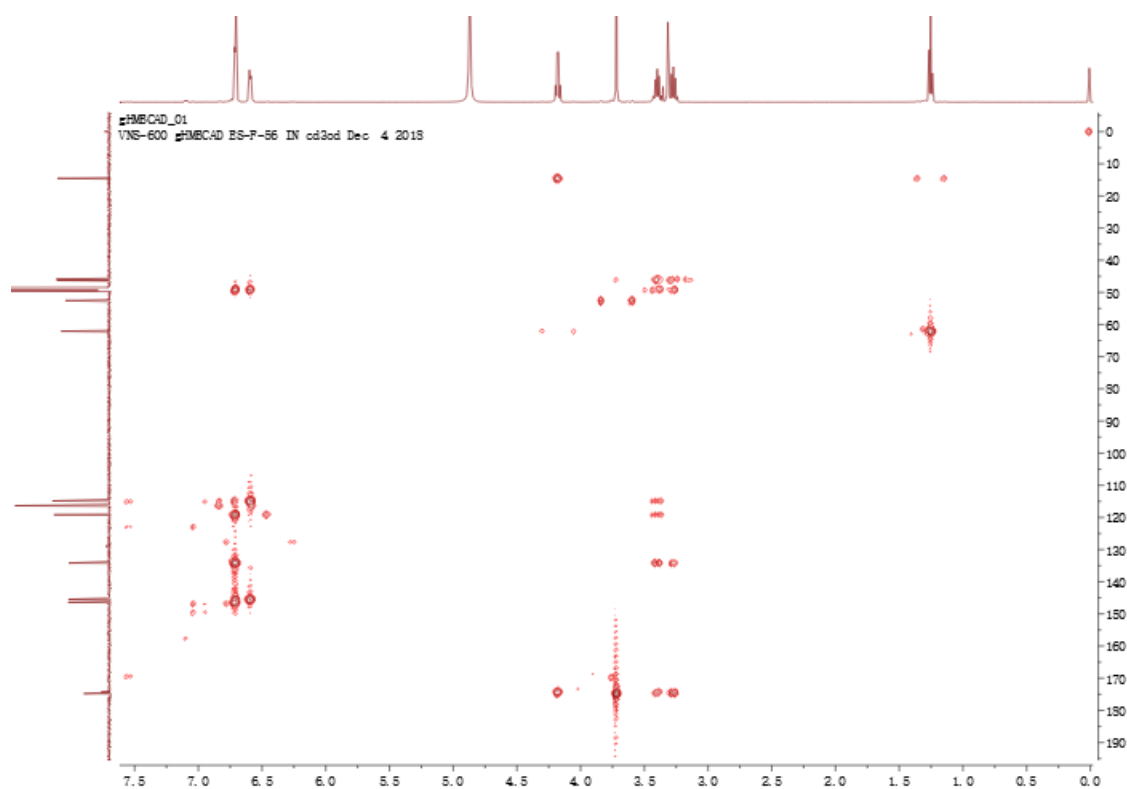

Figure S6. HMBC spectrum (600 MHz) of ethyl 3,3',4,4'-tetrahydroxy- $\delta$ -truxinate (**1**) in CD<sub>3</sub>OD.

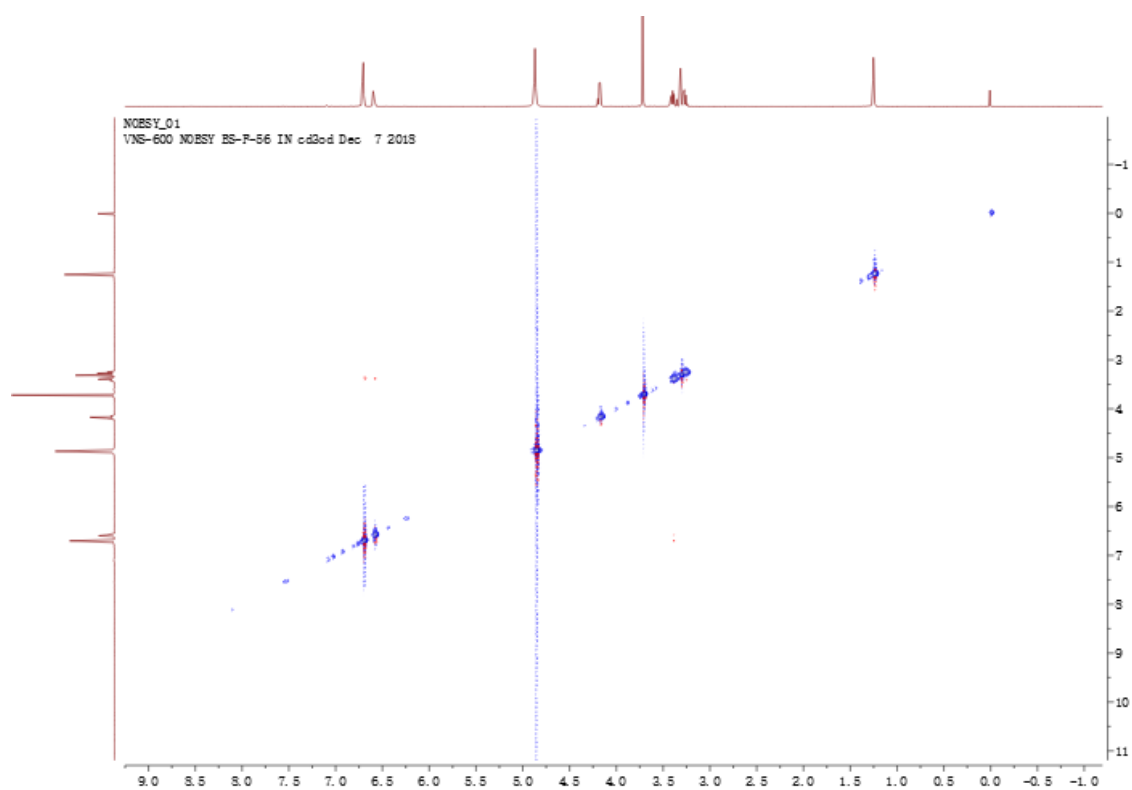

Figure S7. NOESY spectrum (600 MHz) of ethyl 3,3',4,4'-tetrahydroxy- $\delta$ -truxinate (**1**) in CD<sub>3</sub>OD.

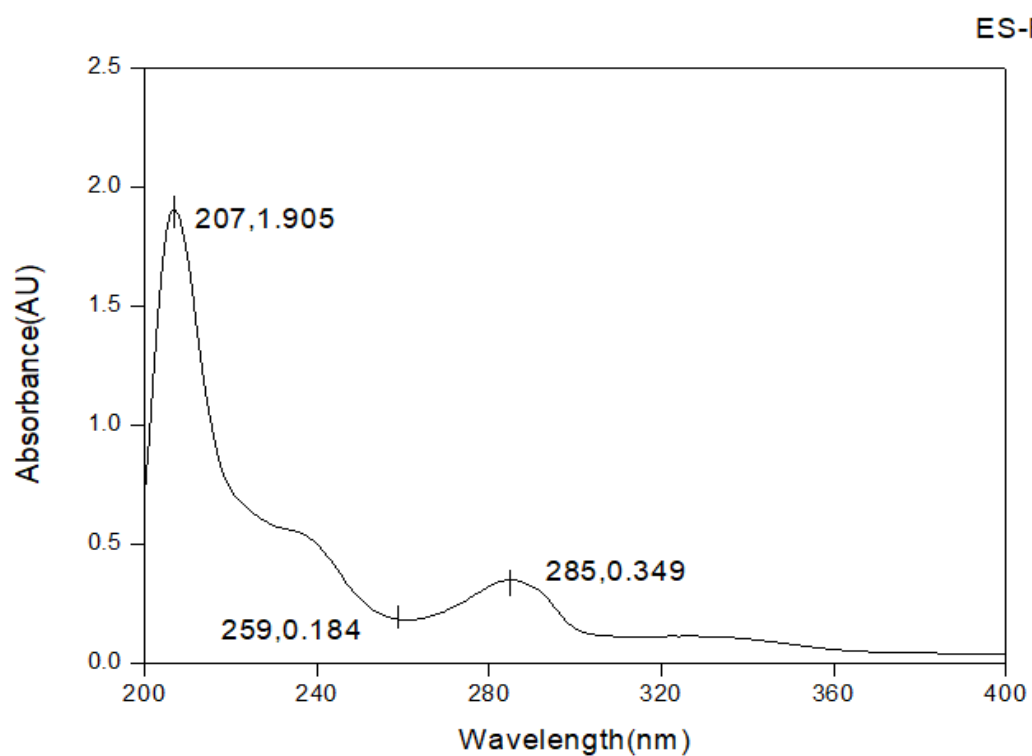

Figure S8. UV spectrum of ethyl 3,3',4,4'-tetrahydroxy- $\delta$ -truxinate (**1**).

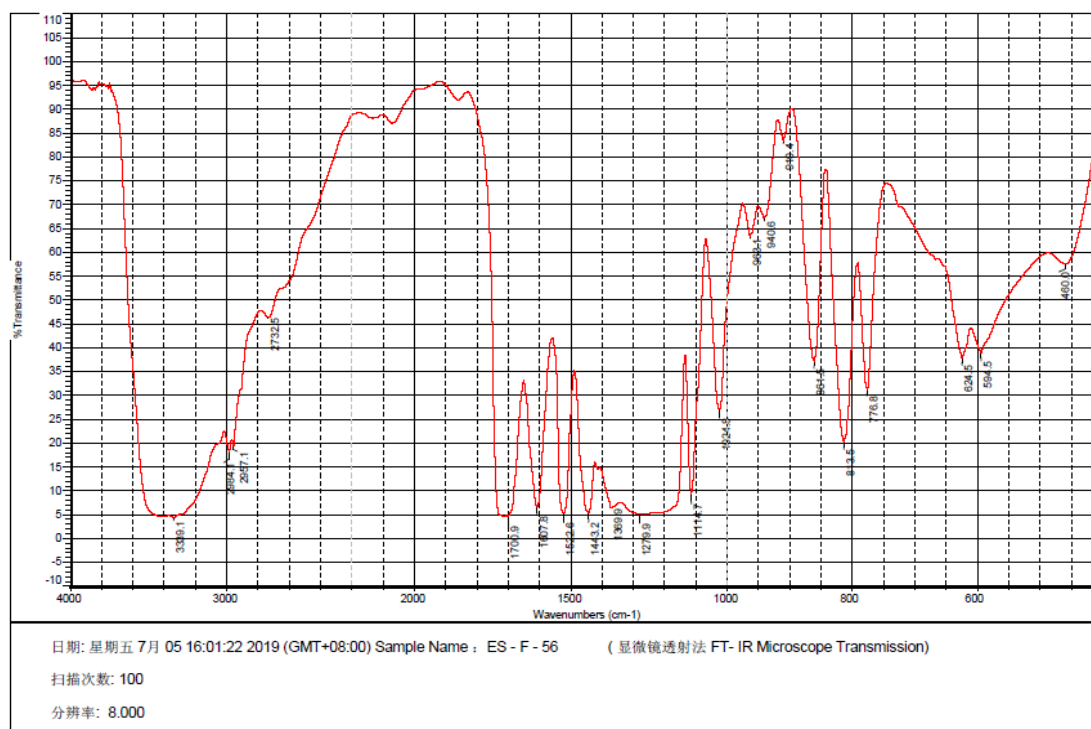

Figure S9. IR spectrum of ethyl 3,3',4,4'-tetrahydroxy- $\delta$ -truxinate (**1**).

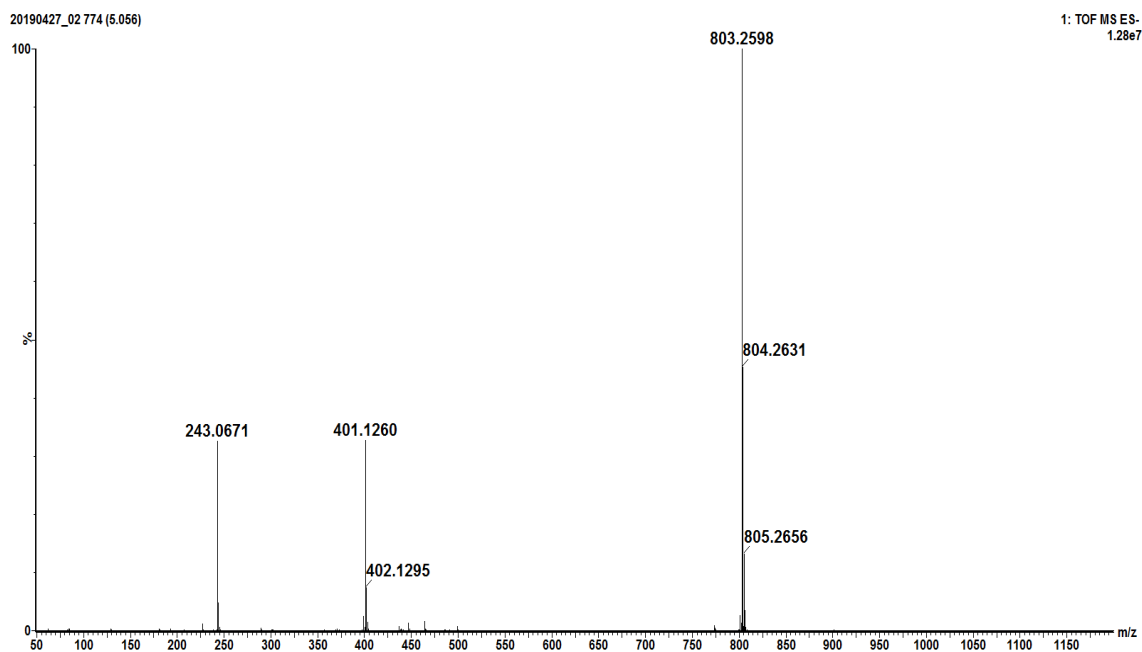

Figure S10. HRESIMS spectrum of ethyl 3,3',4,4'-tetrahydroxy- $\delta$ -truxinate (**1**).

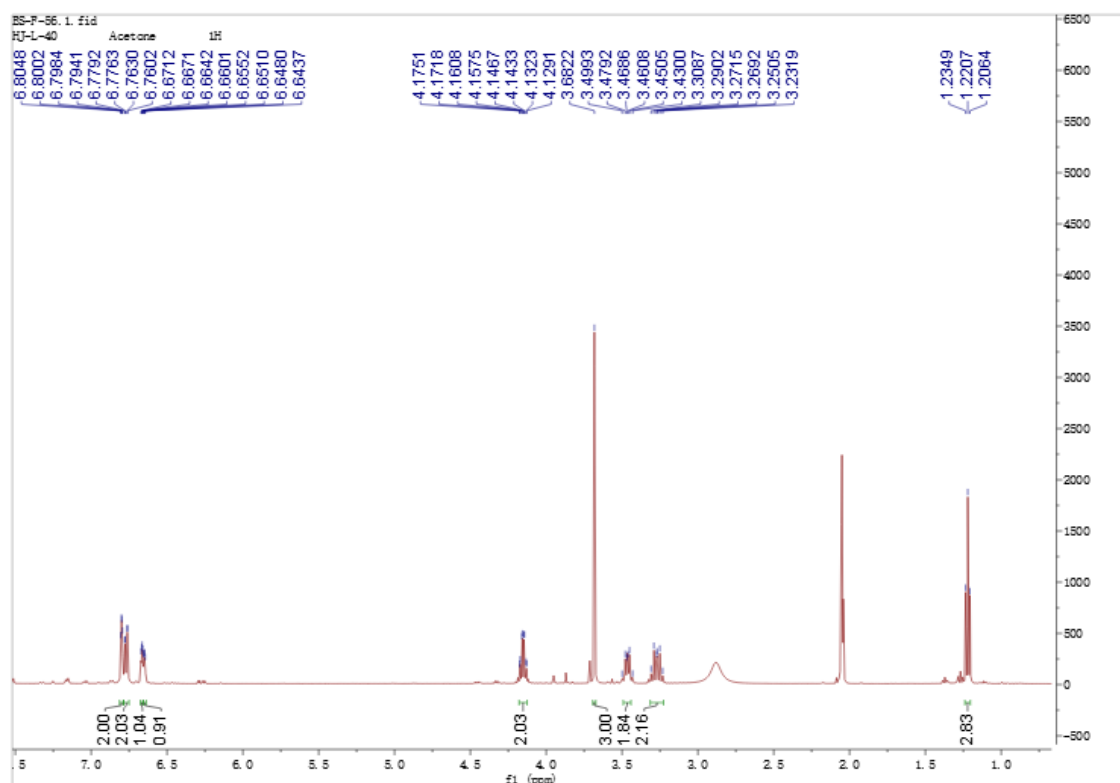

Figure S11.  $^1\text{H}$  NMR spectrum (500 MHz) of ethyl 3,3',4,4'-tetrahydroxy- $\delta$ -truxinate (**1**) in  $\text{CD}_3\text{COCD}_3$

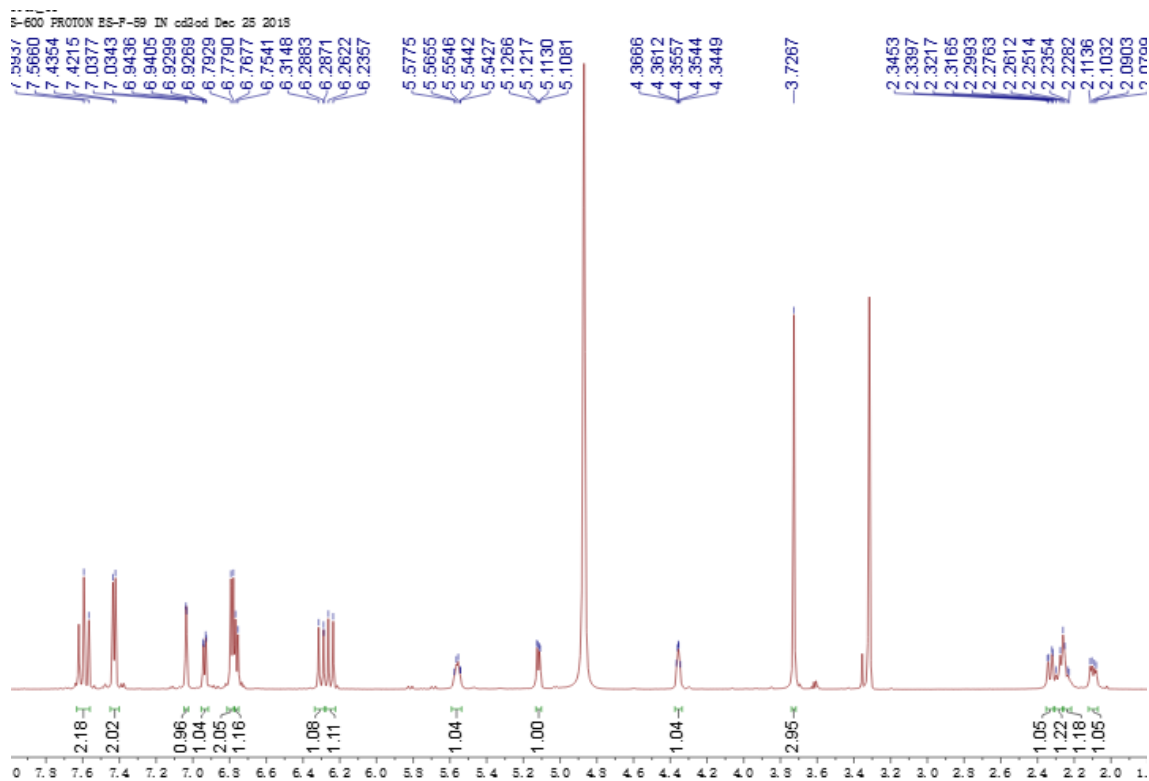

Figure S12.  $^1\text{H}$  NMR spectrum (600 MHz) of 3-*O*-*p*-coumaroyl-4-*O*-caffeoyl quinic acid methyl ester (**2**) in  $\text{CD}_3\text{OD}$ .



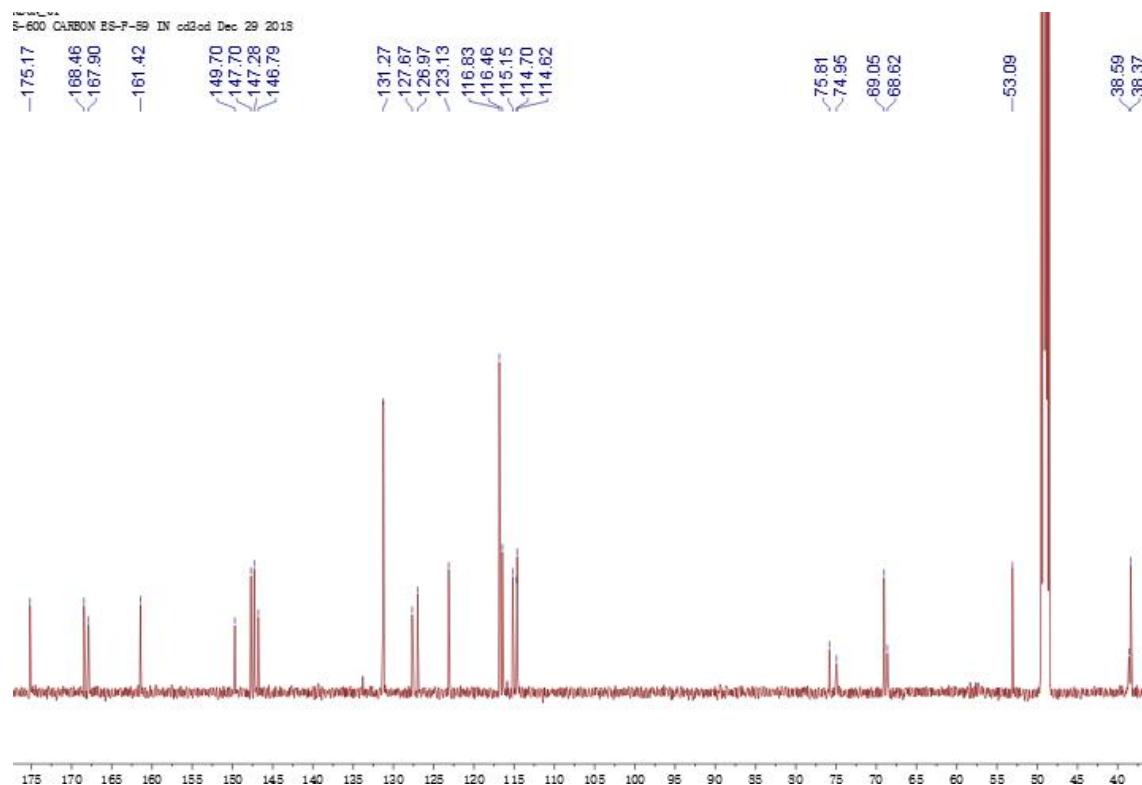

Figure S13.  $^{13}\text{C}$  NMR spectrum (150 MHz) of 3-*O*-*p*-coumaroyl-4-*O*-caffeoyl quinic acid methyl ester (**2**) in  $\text{CD}_3\text{OD}$ .

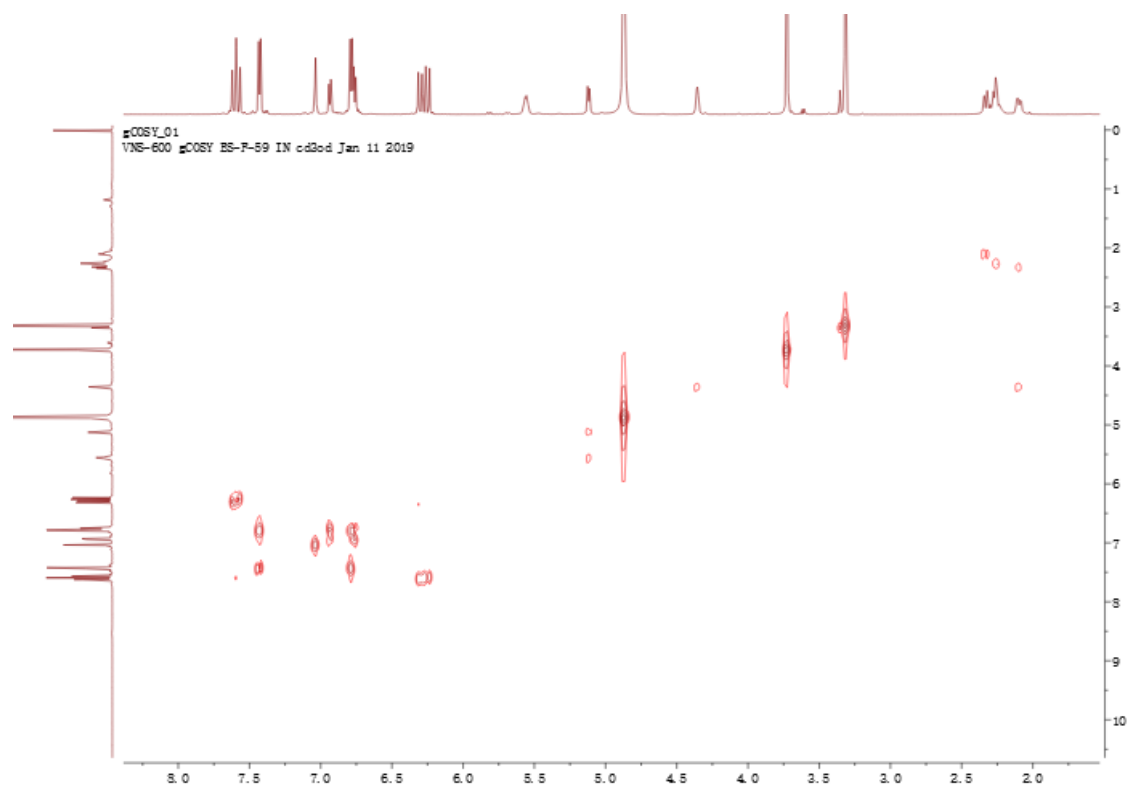

Figure S14.  $^1\text{H}$ - $^1\text{H}$  COSY spectrum (600 MHz) of 3-*O*-*p*-coumaroyl-4-*O*-caffeoyl quinic acid methyl ester (**2**) in  $\text{CD}_3\text{OD}$ .

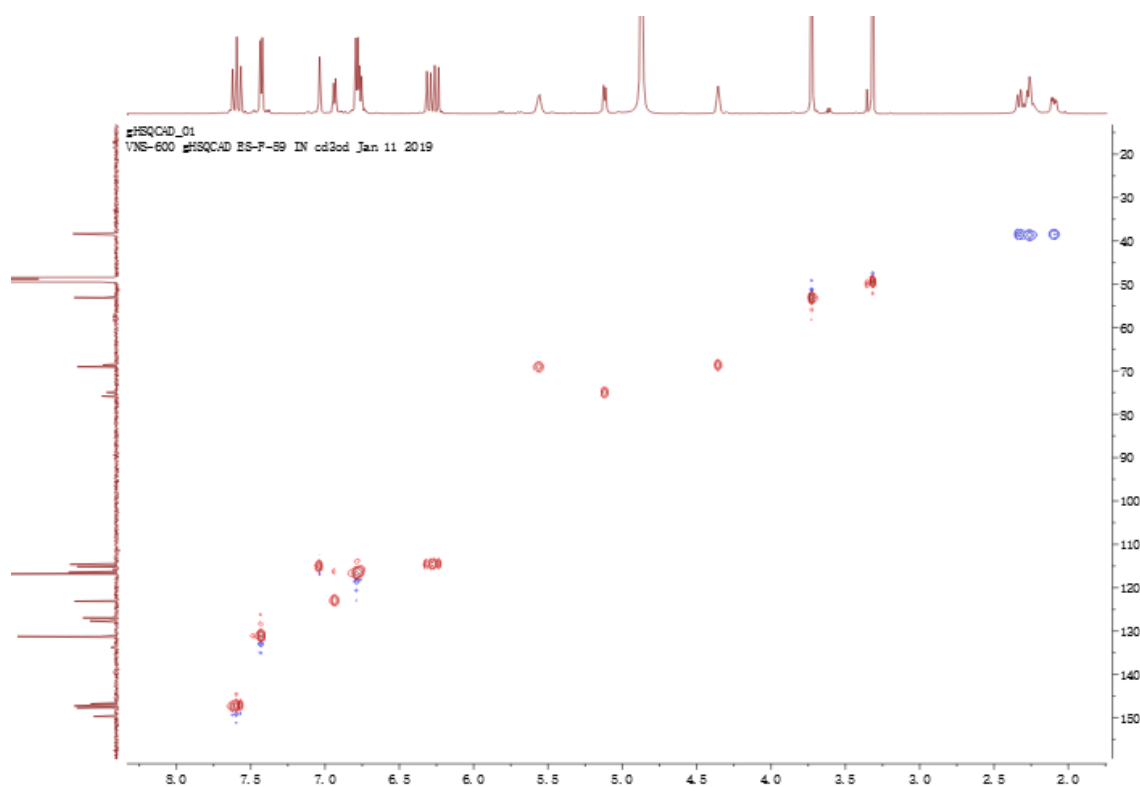

Figure S15. HSQC spectrum (600 MHz) of 3-*O*-*p*-coumaroyl-4-*O*-caffeoyl quinic acid methyl ester (**2**) in CD<sub>3</sub>OD.

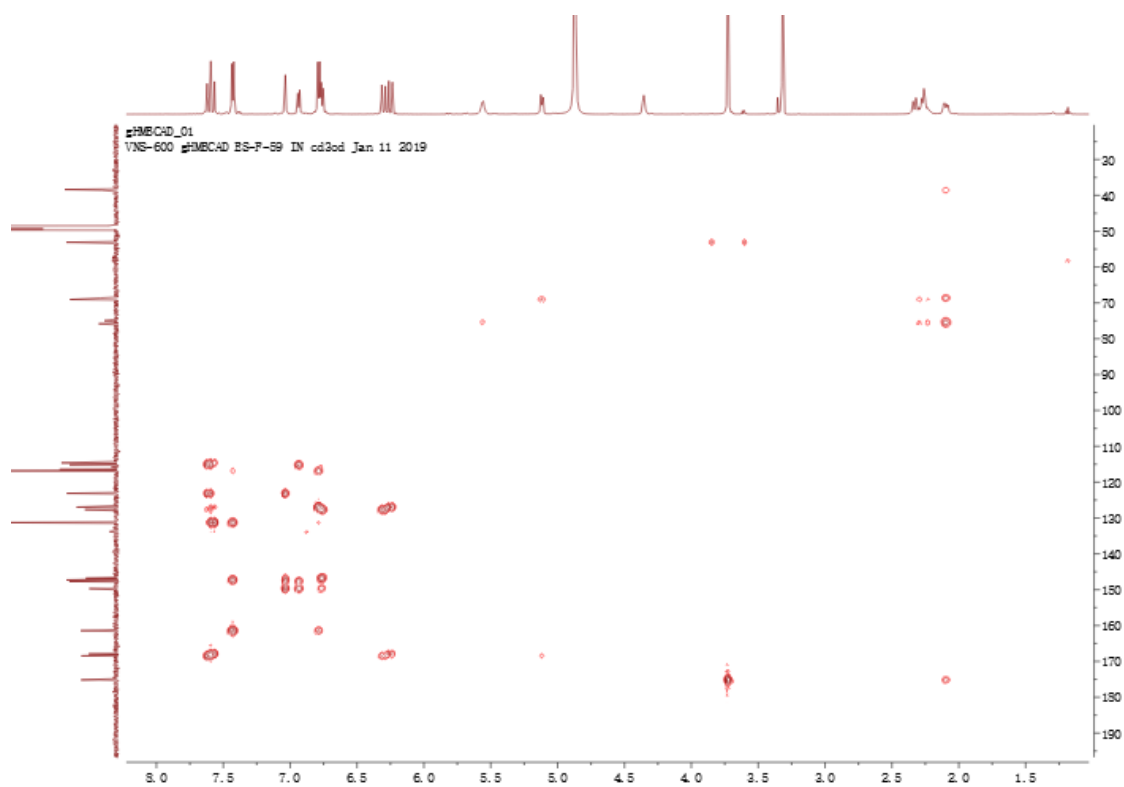

Figure S16. HMBC spectrum (600 MHz) of 3-*O*-*p*-coumaroyl-4-*O*-caffeoyl quinic acid methyl ester (**2**) in CD<sub>3</sub>OD.

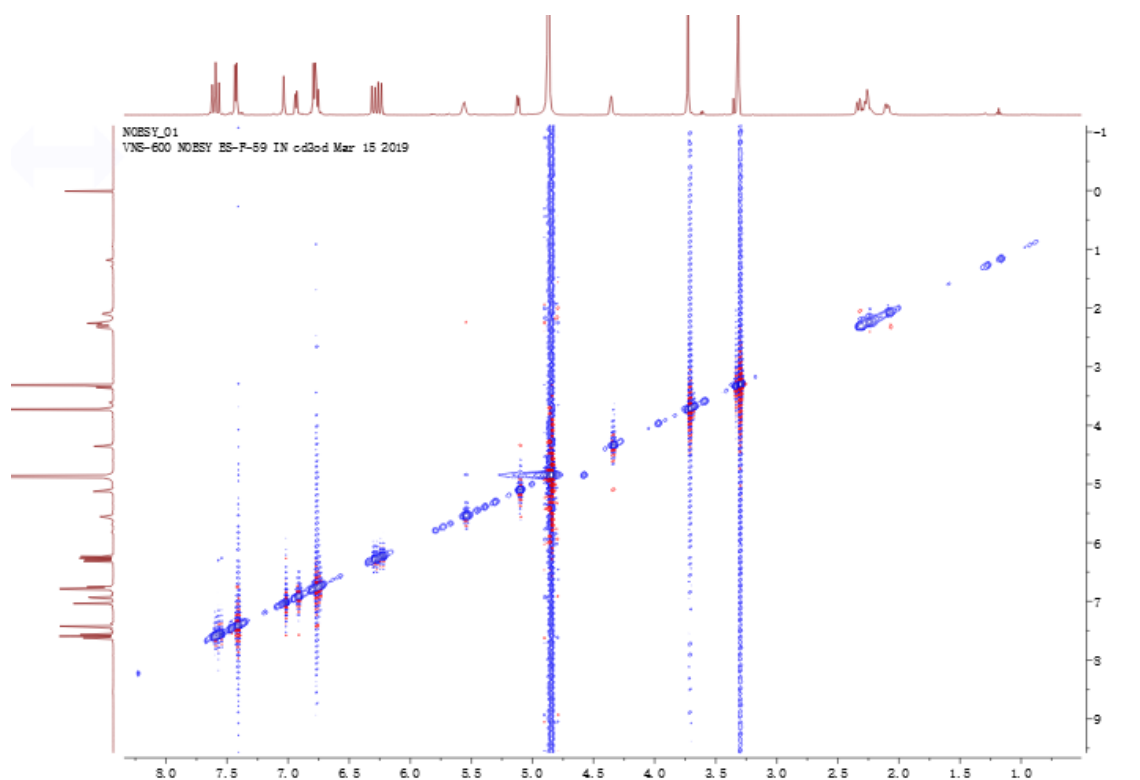

Figure S17. NOESY spectrum (600 MHz) of 3-*O*-*p*-coumaroyl-4-*O*-caffeoyl quinic acid methyl ester (**2**) in CD<sub>3</sub>OD.

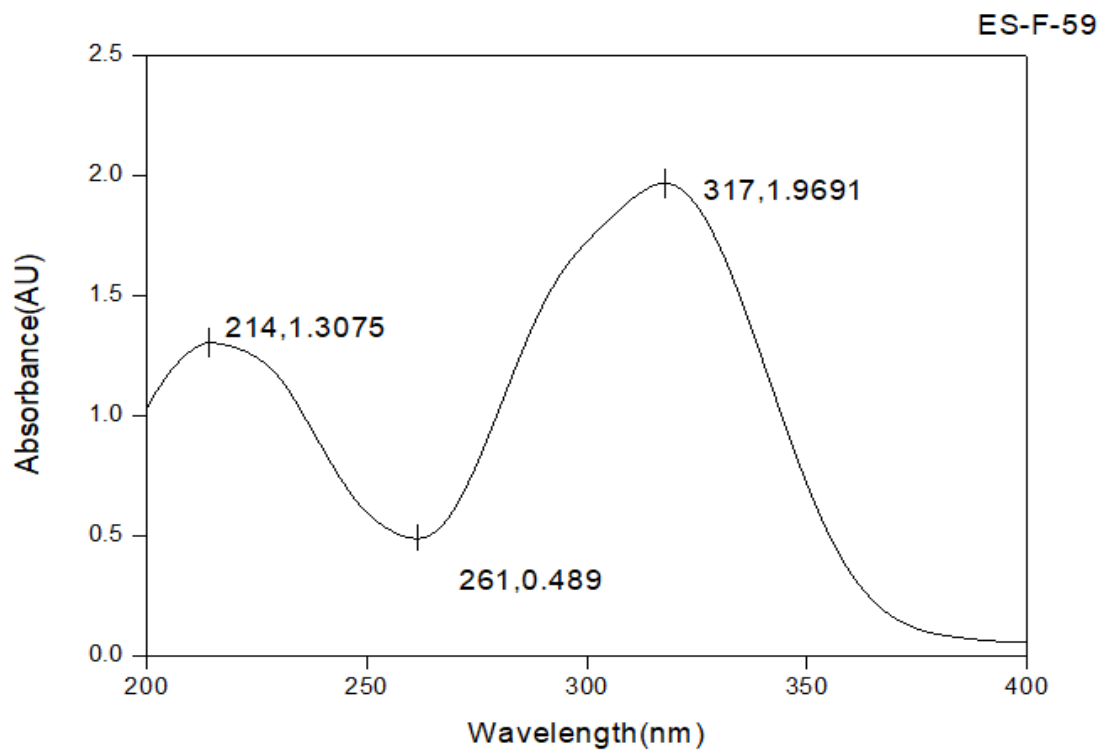

Figure S18. UV spectrum of 3-*O*-*p*-coumaroyl-4-*O*-caffeoyl quinic acid methyl ester (**2**).

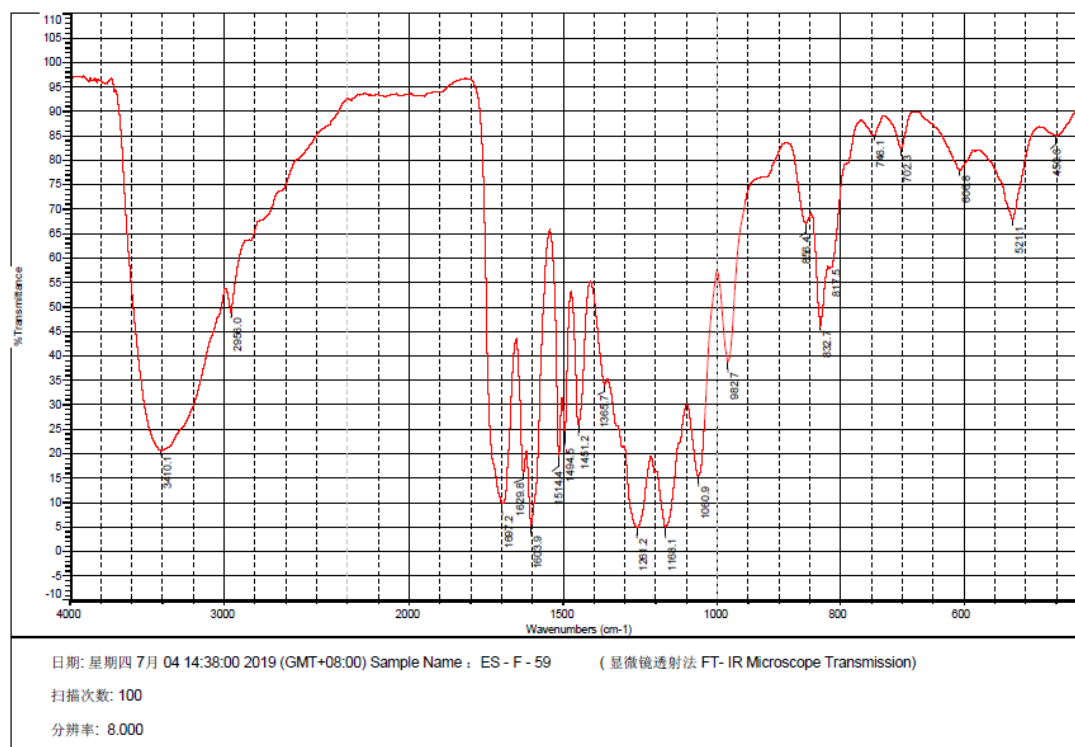

Figure S19. IR spectrum of 3-*O-p*-coumaroyl-4-*O*-caffeoyl quinic acid methyl ester (**2**).

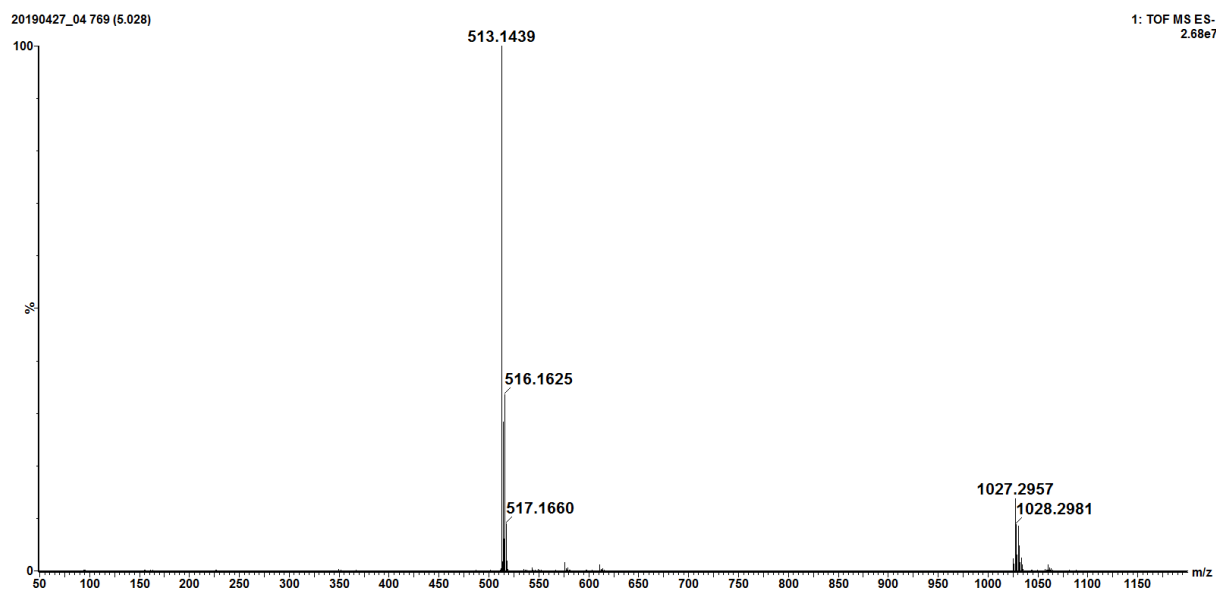

Figure S20. HRESIMS spectrum of 3-*O-p*-coumaroyl-4-*O*-caffeoyl quinic acid methyl ester (**2**).

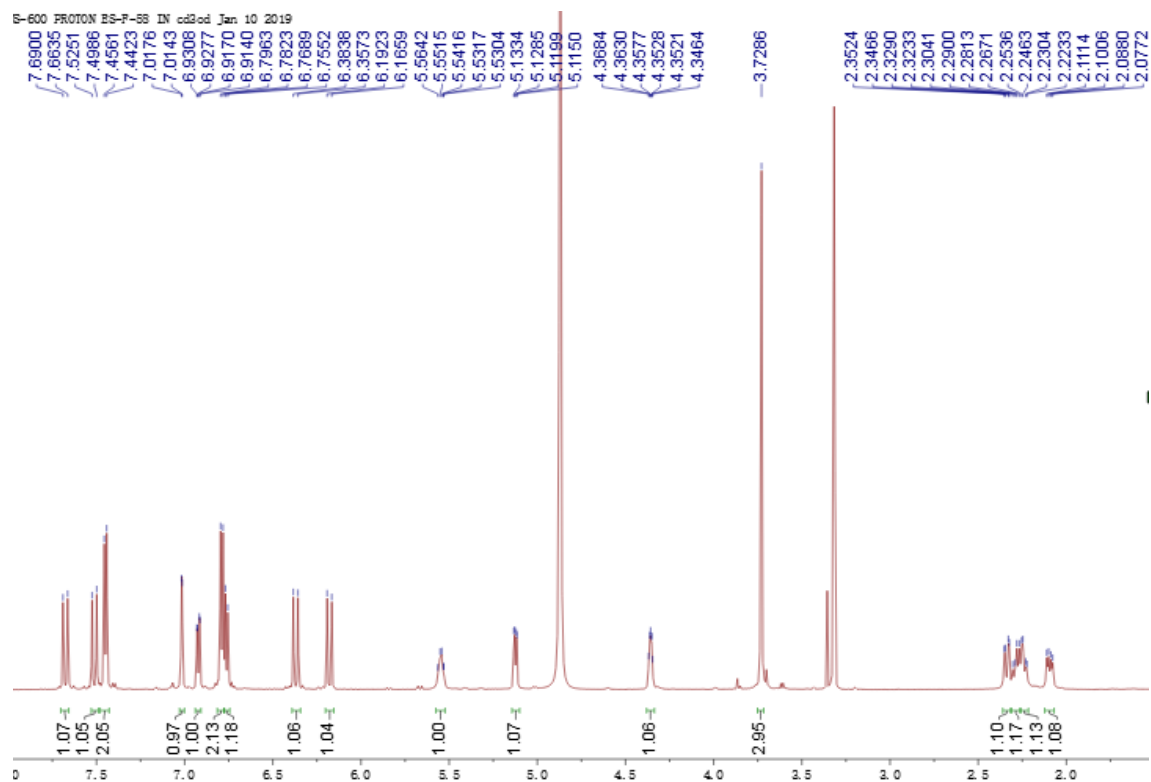

Figure S21.  $^1\text{H}$  NMR spectrum (600 MHz) of 3-*O*-caffeoyl-4-*O*-*p*-coumaroyl quinic acid methyl ester (**3**) in  $\text{CD}_3\text{OD}$ .

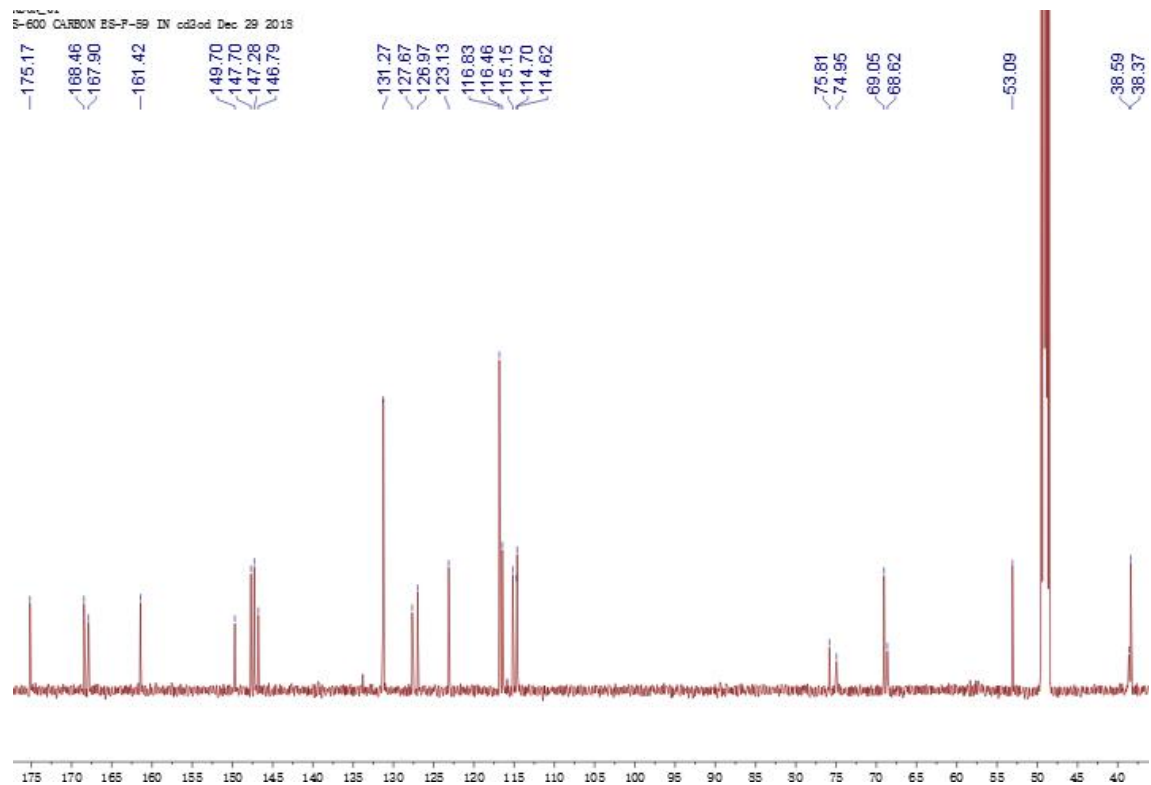

Figure S22.  $^{13}\text{C}$  NMR spectrum (150 MHz) of 3-*O*-caffeoyl-4-*O*-*p*-coumaroyl quinic acid methyl ester (**3**) in  $\text{CD}_3\text{OD}$ .

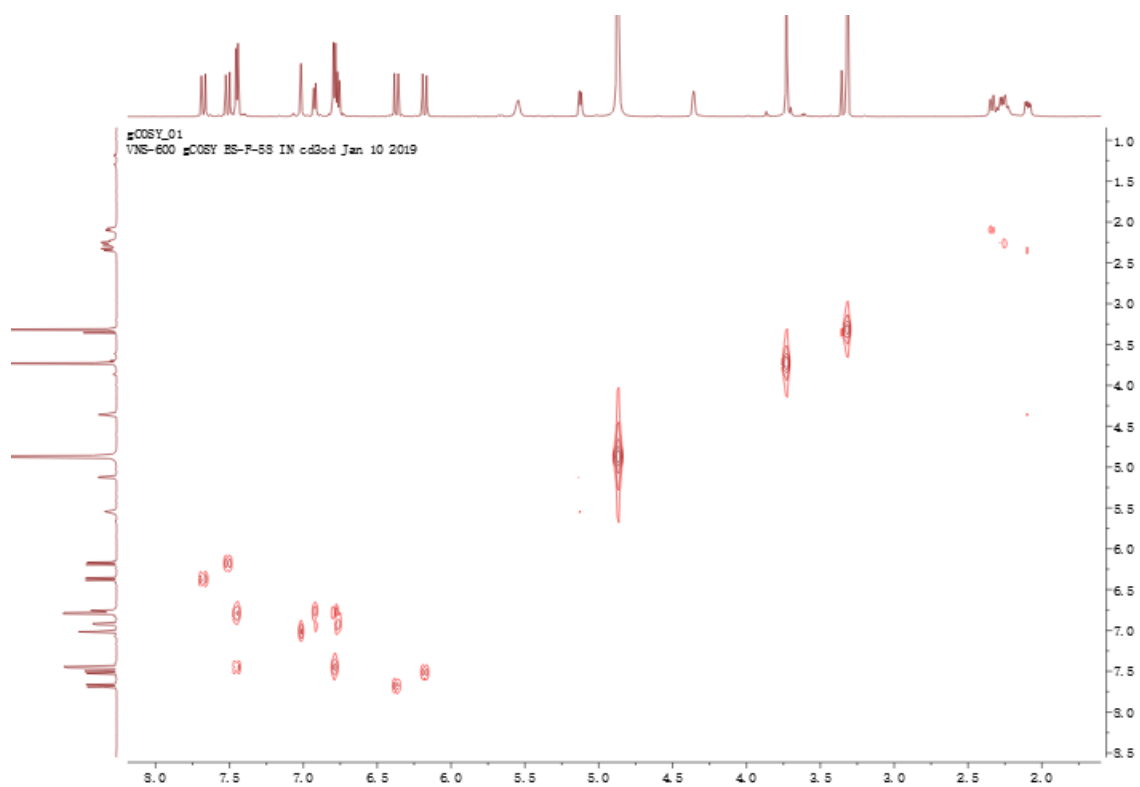

Figure S23.  $^1\text{H}$ - $^1\text{H}$  COSY spectrum (600 MHz) of 3-*O*-caffeoyl-4-*O*-*p*-coumaroyl quinic acid methyl ester (**3**) in  $\text{CD}_3\text{OD}$ .

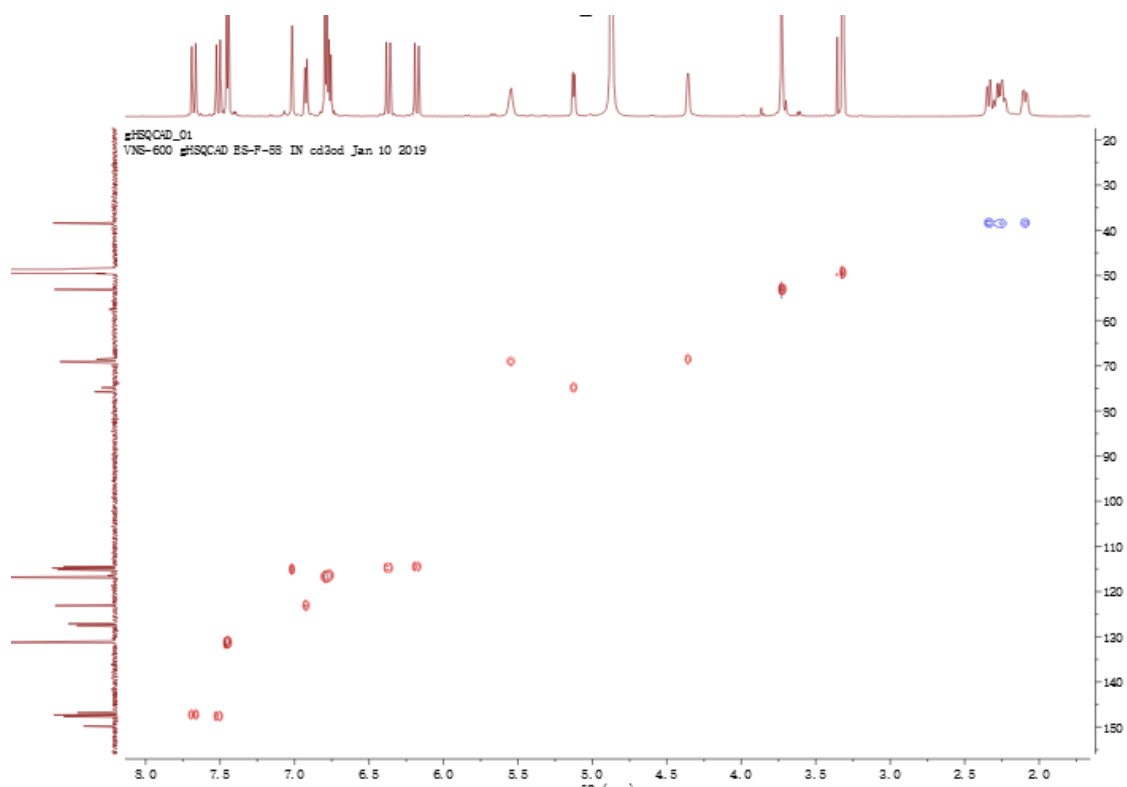

Figure S24. HSQC spectrum (600 MHz) of 3-*O*-caffeoyl-4-*O*-*p*-coumaroyl quinic acid methyl ester (**3**) in  $\text{CD}_3\text{OD}$ .

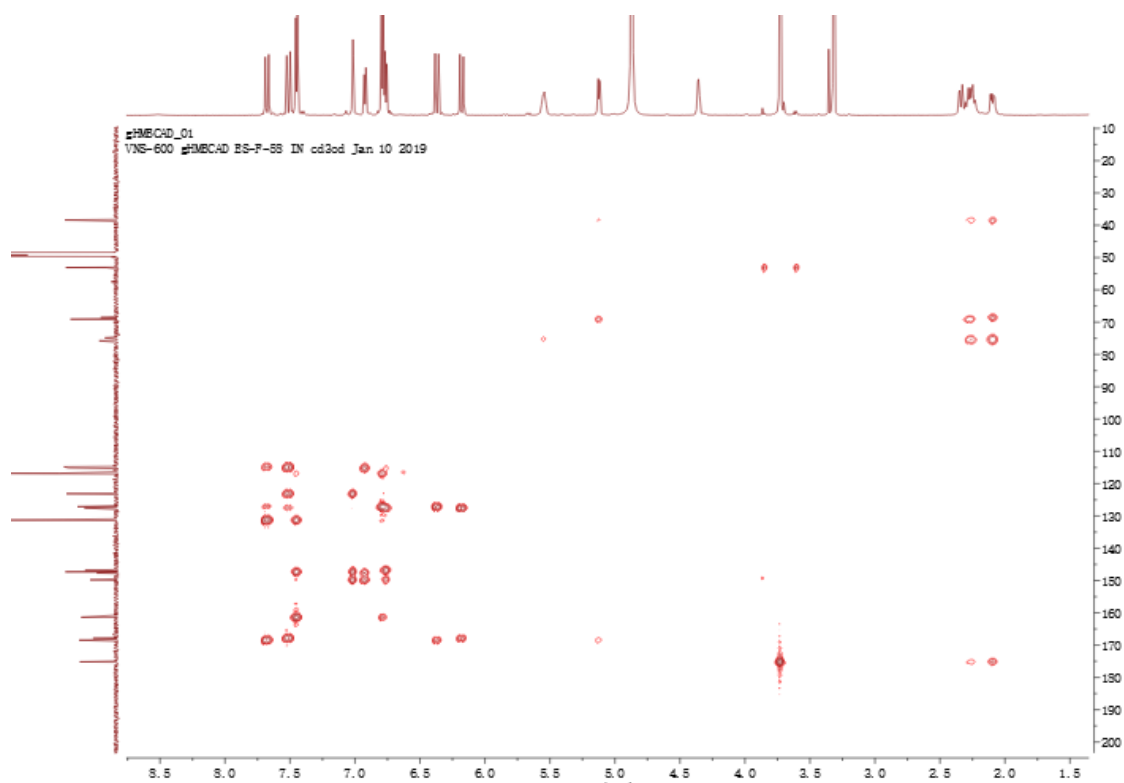

Figure S25. HMBC spectrum (600 MHz) of 3-*O*-caffeoyl-4-*O*-*p*-coumaroyl quinic acid methyl ester (**3**) in CD<sub>3</sub>OD.

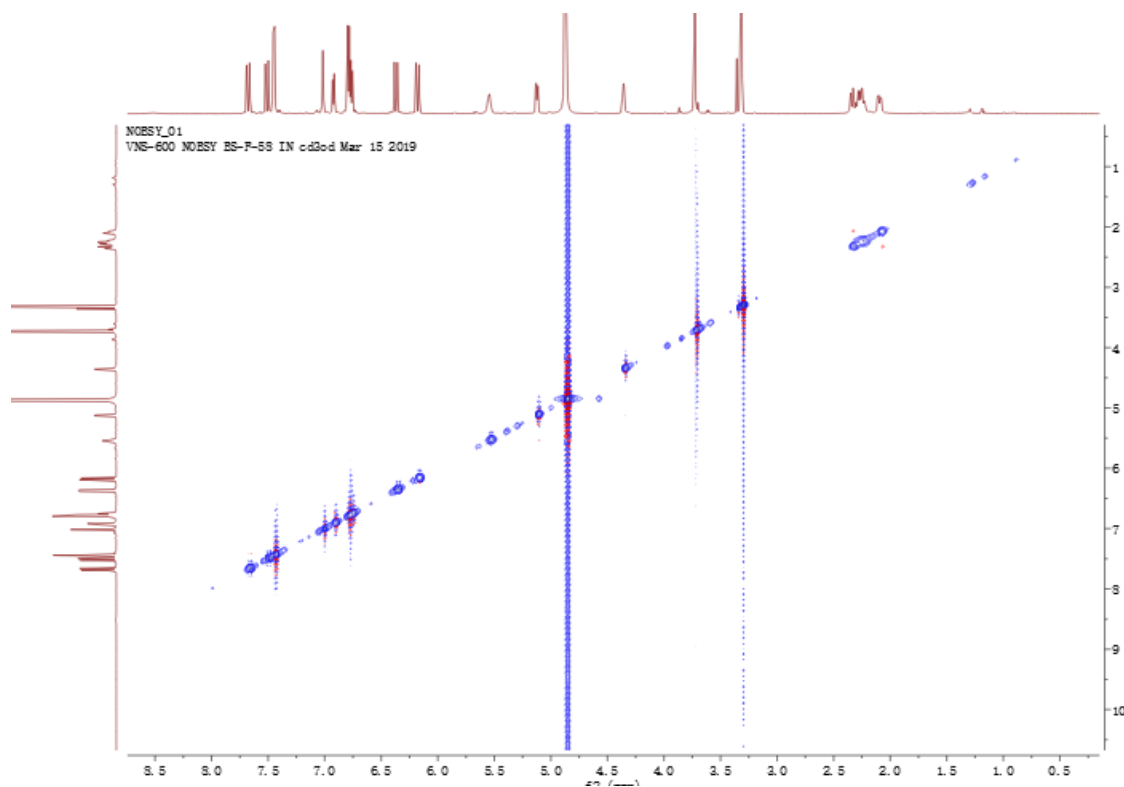

Figure S26. ROESY spectrum (600 MHz) of 3-*O*-caffeoyl-4-*O*-*p*-coumaroyl quinic acid methyl ester (**3**) in CD<sub>3</sub>OD.

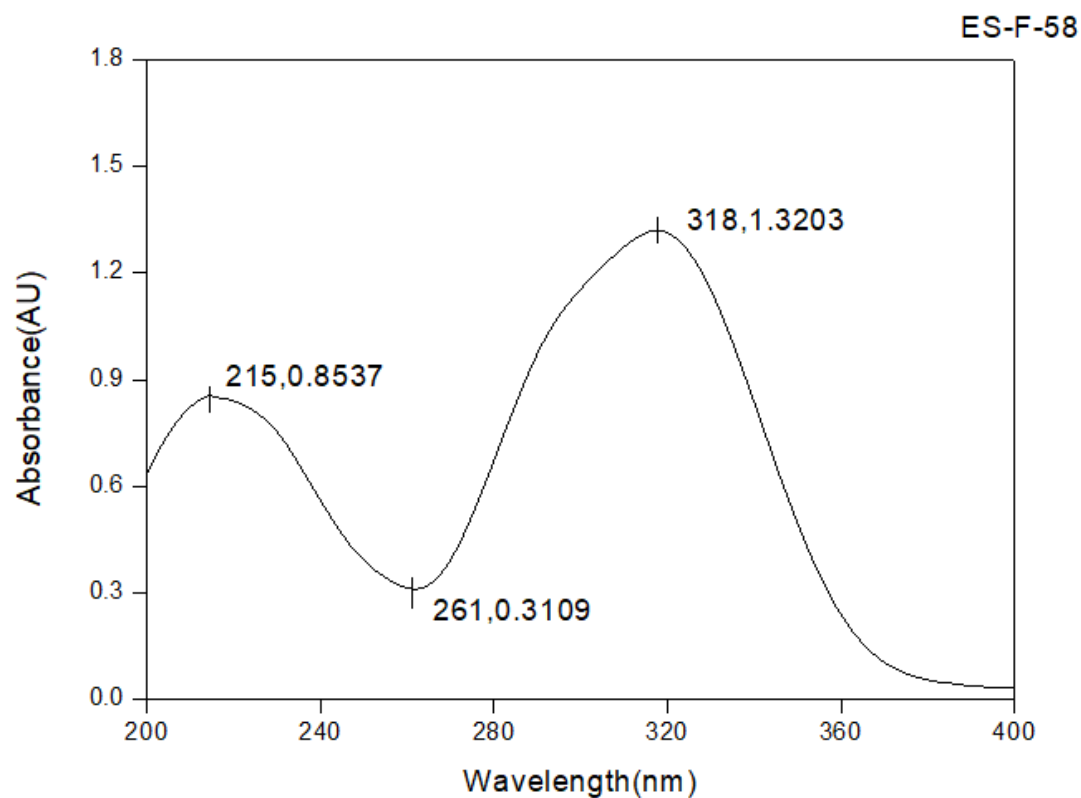

Figure S27. UV spectrum of 3-*O*-caffeoyl-4-*O*-*p*-coumaroyl quinic acid methyl ester (**3**).

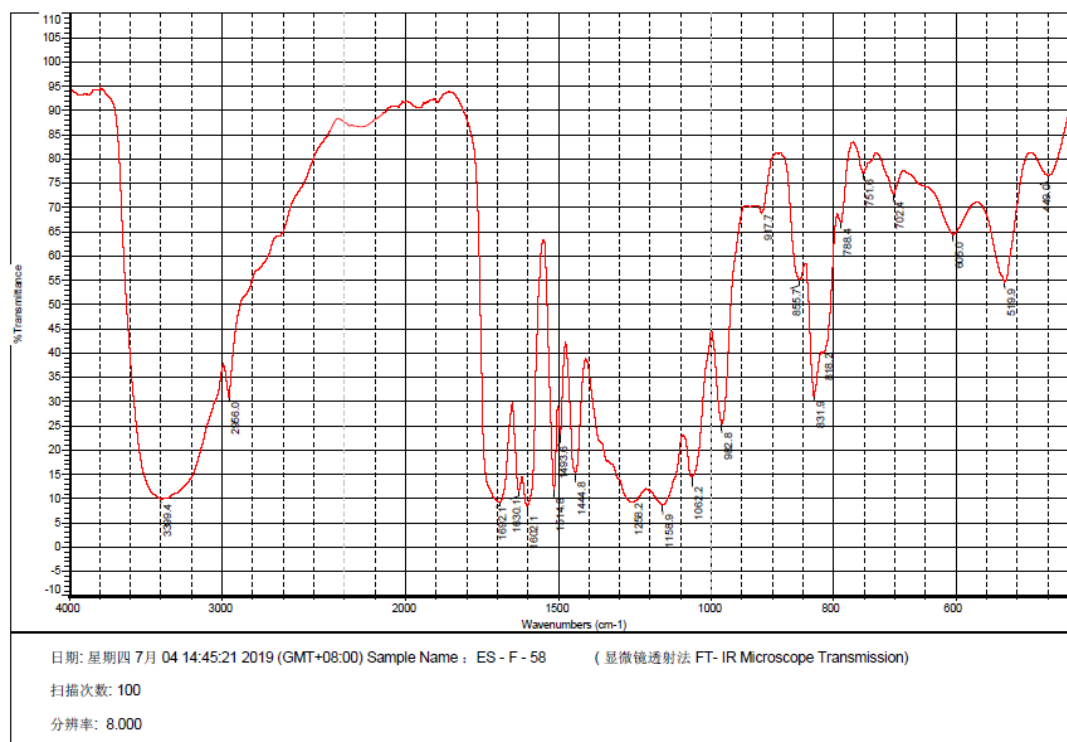

Figure S28. IR spectrum of 3-*O*-caffeoyl-4-*O*-*p*-coumaroyl quinic acid methyl ester (**3**).



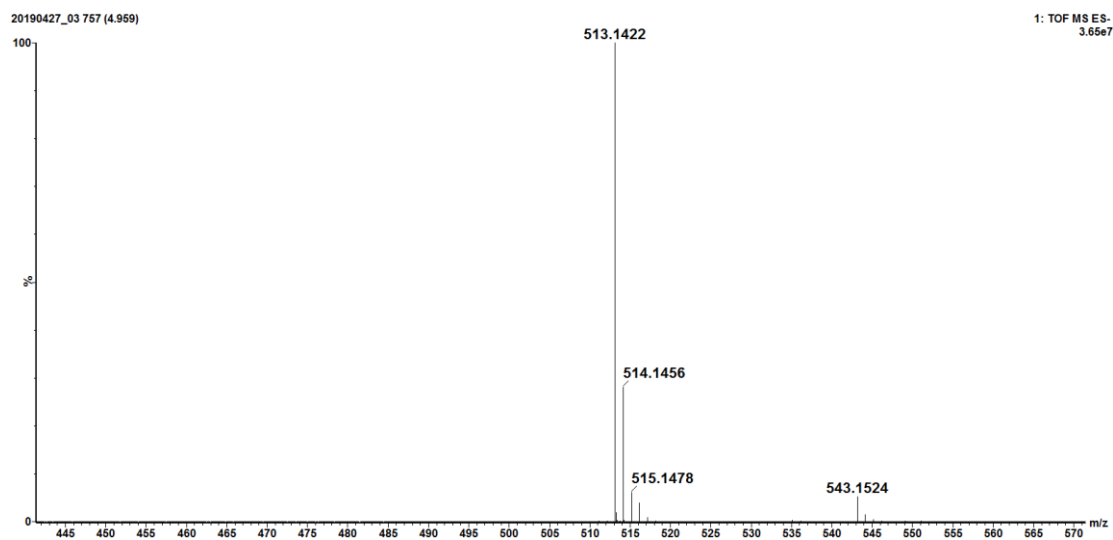

Figure S29. HRESIMS spectrum of 3-*O*-caffeoyl-4-*O*-*p*-coumaroyl quinic acid methyl ester (**3**).

**Table S1.** <sup>1</sup>H (600 MHz) and <sup>13</sup>C NMR (150 MHz) data of compounds **1**, **2** and **3** in CD<sub>3</sub>OD.

| NO.                 | <b>1</b>            |                     | <b>2</b>            |                     | <b>3</b>            |                     |
|---------------------|---------------------|---------------------|---------------------|---------------------|---------------------|---------------------|
|                     | $\delta_{\text{H}}$ | $\delta_{\text{C}}$ | $\delta_{\text{H}}$ | $\delta_{\text{C}}$ | $\delta_{\text{H}}$ | $\delta_{\text{C}}$ |
| 1                   |                     | 134.2               |                     | 75.8                |                     | 75.8                |
| 2 $\alpha$          | 6.71 d (2.1)        | 119.2               | 2.27 m              | 38.6                | 2.24 dd (4.3, 13.9) | 38.5                |
| 2 $\beta$           |                     |                     |                     |                     | 2.29 dd (8.5, 13.9) |                     |
| 3                   |                     | 146.4               | 5.55 m              | 69.1                | 5.54 m              | 69.1                |
| 4                   |                     | 145.5               | 5.12 dd (2.9, 8.2)  | 75.0                | 5.12 dd (3.0, 8.1)  | 74.8                |
| 5                   | 6.70 d (8.2)        | 116.4               | 4.36 m              | 68.6                | 4.36 m              | 68.6                |
| 6 $\alpha$          | 6.58 dd (2.1, 8.2)  | 114.9               | 2.10 dd (6.3, 14.0) | 38.4                | 2.09 dd (6.5, 14.0) | 38.4                |
| 6 $\beta$           |                     |                     | 2.33 dd (3.2, 14.0) |                     | 2.34 dd (3.4, 14.0) |                     |
| 7                   | 3.40 t ( 8.6)       | 49.0                |                     | 175.2               |                     | 175.2               |
| 7-OCH <sub>3</sub>  |                     |                     | 3.73 s              | 53.1                | 3.73 s              | 53.1                |
| 8                   | 3.27 t (8.6)        | 45.9                |                     |                     |                     |                     |
| 9                   |                     | 174.3               |                     |                     |                     |                     |
| 10                  | 4.18 m              | 62.1                |                     |                     |                     |                     |
| 11                  | 1.25 t (7.1)        | 14.5                |                     |                     |                     |                     |
| 1'                  |                     | 134.2               |                     | 127.7               |                     | 127.1               |
| 2'                  | 6.71 d (2.1)        | 119.2               | 7.43 d (8.2)        | 131.3               | 7.02 d (2.0)        | 115.1               |
| 3'                  |                     | 146.4               | 6.79 d (8.2 )       | 116.8               |                     | 146.8               |
| 4'                  |                     | 145.5               |                     | 161.4               |                     | 149.8               |
| 5'                  | 6.70 d (8.2)        | 116.4               | 6.79 d (8.2 )       | 116.8               | 6.76 d (8.2)        | 116.5               |
| 6'                  | 6.59 dd (2.1, 8.2)  | 114.9               | 7.43 d (8.2)        | 131.3               | 6.92 d d (2.0, 8.2) | 123.1               |
| 7'                  | 3.40 t (8.6)        | 49.2                | 7.58 d (15.9)       | 147.3               | 7.51 d (15.9)       | 147.7               |
| 8'                  | 3.27 t (8.6)        | 46.2                | 6.25 d (15.9)       | 114.6               | 6.18 d (15.9)       | 114.5               |
| 9'                  |                     | 174.8               |                     | 167.9               |                     | 167.9               |
| 9'-OCH <sub>3</sub> | 3.71 s              | 52.6                |                     |                     |                     |                     |
| 1''                 |                     |                     |                     | 127.0               |                     | 127.5               |
| 2''                 |                     |                     | 7.04 d (2.0)        | 115.2               | 7.45 d (8.2)        | 131.3               |
| 3''                 |                     |                     |                     | 146.8               | 6.79 d (8.2)        | 116.8               |
| 4''                 |                     |                     |                     | 149.7               |                     | 161.4               |
| 5''                 |                     |                     | 6.76 d (8.2)        | 116.5               | 6.79 d (8.2)        | 116.8               |
| 6''                 |                     |                     | 6.94 dd (2.0, 8.2)  | 123.1               | 7.45 d (8.2)        | 131.3               |
| 7''                 |                     |                     | 7.61 d (15.9)       | 147.7               | 7.68 d (15.9)       | 147.3               |
| 8''                 |                     |                     | 6.30 d (15.9)       | 114.7               | 6.37 d (15.9)       | 114.8               |
| 9''                 |                     |                     |                     | 168.5               |                     | 168.4               |

**Table S2.** <sup>1</sup>H (500 MHz) data of compound **1** in CD<sub>3</sub>COCD<sub>3</sub>, and <sup>1</sup>H (600 MHz) and <sup>13</sup>C NMR (150 MHz) data of compounds **4** and **5** in CD<sub>3</sub>OD.

| NO.                | <b>1</b>            | <b>4</b>            |                     | <b>5</b>            |                     |
|--------------------|---------------------|---------------------|---------------------|---------------------|---------------------|
|                    | $\delta_{\text{H}}$ | $\delta_{\text{H}}$ | $\delta_{\text{C}}$ | $\delta_{\text{H}}$ | $\delta_{\text{C}}$ |
| 1                  |                     |                     | 131.9               |                     | 132.3               |
| 2                  | 6.80 d (2.2)        | 6.64 d (2.1)        | 114.1               | 6.65 d (2.2)        | 114.1               |
| 3                  |                     |                     | 144.4               |                     | 145.2               |
| 4                  |                     |                     | 145.3               |                     | 144.3               |
| 5                  | 6.76 d (8.1)        | 6.66 d (8.1)        | 115.6               | 6.64 d (8.2)        | 115.5               |
| 6                  | 6.65 dd (2.2, 8.1)  | 6.51 dd (2.1, 8.1)  | 117.6               | 6.50 dd (2.2, 8.2)  | 117.5               |
| 7                  | 3.46 t (9.5)        | 3.30 dd like        | 47.2                | 3.28 dd like        | 47.0                |
| 8                  | 3.25 t (9.5)        | 3.19 dd like        | 44.2                | 3.06 dd like        | 44.4                |
| 9                  |                     |                     | 172.5               |                     | 172.7               |
| 9-OCH <sub>3</sub> |                     | 3.64 s              | 52.0                |                     |                     |
| 10                 | 4.15 m              |                     |                     |                     |                     |
| 11                 | 1.22 t (7.1)        |                     |                     |                     |                     |
| 1'                 |                     |                     | 131.9               |                     | 132.2               |
| 2'                 | 6.81 d (2.2)        | 6.64 d (2.1)        | 114.1               | 6.66 d(2.2)         | 114.1               |
| 3'                 |                     |                     | 144.4               |                     | 145.3               |
| 4'                 |                     |                     | 145.3               |                     | 144.4               |
| 5'                 | 6.77 d (8.1)        | 6.66 d (8.1)        | 115.6               | 6.64 d (8.2)        | 115.6               |
| 6'                 | 6.66 dd (2.2, 8.1)  | 6.51 dd (2.1, 8.1)  | 117.6               | 6.51 dd (2.2, 8.2)  | 117.6               |
| 7'                 | 3.47 t (9.5)        | 3.30 dd like        | 47.2                | 3.28 dd like        | 47.2                |
| 8'                 | 3.26 t (9.5)        | 3.19 dd like        | 44.2                | 3.06 dd like        | 44.8                |
| 9'                 |                     |                     | 172.5               |                     | 173.7               |
| 9'-OCH             | 3.68 s              | 3.64 s              | 52.0                | 3.64 s              | 51.9                |

**Table S3.** Inhibition of compounds **1–5** on the NO production in LPS-activated RAW264.7 cells.

| Compounds                   | IC <sub>50</sub> ( $\mu$ M) <sup>a</sup> |
|-----------------------------|------------------------------------------|
| <b>1</b>                    | 12.93 $\pm$ 0.27                         |
| <b>2</b>                    | 77.80 $\pm$ 2.32                         |
| <b>3</b>                    | 71.28 $\pm$ 1.71                         |
| <b>4</b>                    | 11.85 $\pm$ 0.31                         |
| <b>5</b>                    | 20.62 $\pm$ 0.43                         |
| <i>L</i> -NAME <sup>b</sup> | 35.96 $\pm$ 0.90                         |

<sup>a</sup> All data are present as the mean of IC<sub>50</sub> values with the standard deviation from the triplicate measurement.

<sup>b</sup> N-Nitro-L-arginine methyl ester hydrochloride (*L*-NAME) is an A medicine to diminish NO.

**Table S4.** Effects of compounds **1–5** (100  $\mu$ M) on RAW264.7 cells viability.

| Compounds | cell viability vs control (%) |
|-----------|-------------------------------|
| <b>1</b>  | 88.39 $\pm$ 2.64              |
| <b>2</b>  | 92.74 $\pm$ 3.55              |
| <b>3</b>  | 95.36 $\pm$ 2.31              |
| <b>4</b>  | 90.58 $\pm$ 3.27              |
| <b>5</b>  | 91.18 $\pm$ 1.28              |
